# Supplementary material for: Monitoring the solvation process and stability of Eu2+ in an ionic liquid by in situ luminescence analysis
Source: publisher site journal article supplement (doi:10.1515/znb-2018-0201), 2018-11-22
Supplement: Supplementary file 1 [file B18201-suppinfo2a.pdf › Supplement/B18201-suppinfo2a.pdf]

# Supporting Information

**Laura Ruiz Arana, Jacob Olchowka, Huayna Terraschke**

## **Monitoring the solvation process and stability of $\text{Eu}^{2+}$ in an ionic liquid by *in-situ* luminescence analysis**

DOI: 10.1515/znb-2018-0201. Received October 11, 2018; accepted October 31, 2018

**Corresponding authors:** **Dr. Jacob Olchowka**, Université de Genève, Département de Chimie Physique, Quai Ernest Ansermet, 30 - Science II, 1211 Genève 4, Switzerland, and CNRS, Université de Bordeaux, Bordeaux INP, ICMCB UMR 5026, Pessac, F-33600, France, e-mail: jacob.olchowka@icmcb.cnrs.fr and **Dr. Huayna Terraschke**, Institut für Anorganische Chemie, Christian-Albrechts-Universität zu Kiel, Max-Eyth-Straße 2, 24118 Kiel, Germany; Fax +49 (0)431 880 1520, e-mail: hterraschke@ac.uni-kiel.de

**Laura Ruiz Arana:** Institut für Anorganische Chemie, Christian-Albrechts-Universität zu Kiel, Max-Eyth-Straße 2, 24118 Kiel, Germany

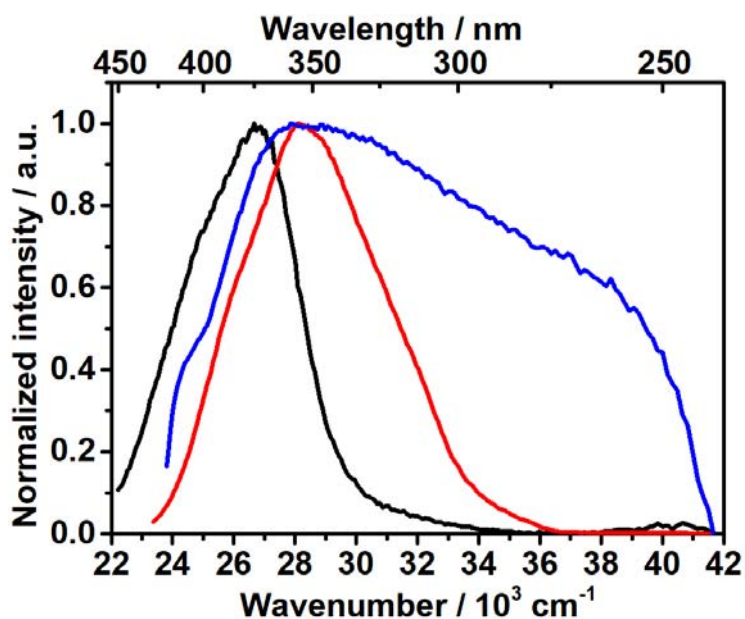

Figure S1: Comparison of the excitation spectra of  $\text{EuBr}_2$  ( $\lambda_{\text{em}} = 430$  nm, blue curve),  $\text{BmimBF}_4$  ( $\lambda_{\text{em}} = 435$  nm, red curve) and  $\text{EuBr}_2$  solved in  $\text{BmimBF}_4$  ( $\lambda_{\text{em}} = 460$  nm, black curve).

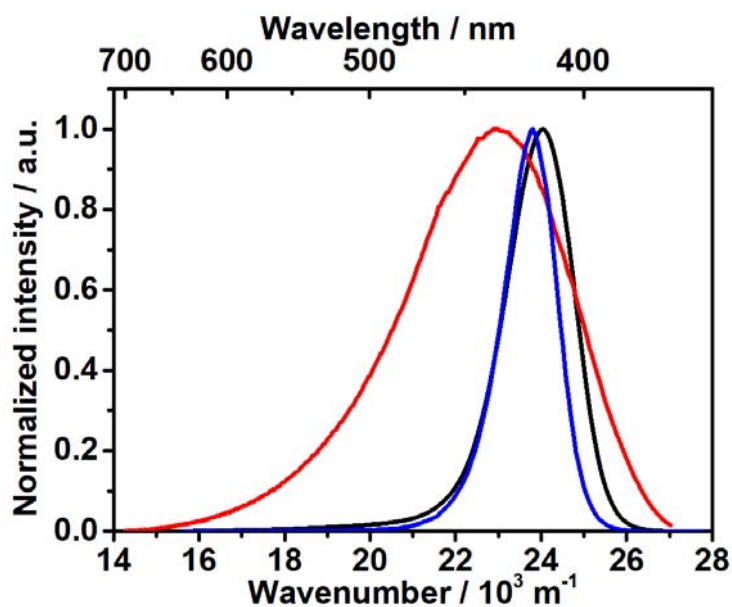

Figure S2: Comparison of emission spectra of  $\text{EuCl}_2$  ( $\lambda_{\text{ex}} = 430$  nm, blue curve),  $\text{BmimBF}_4$  ( $\lambda_{\text{ex}} = 435$  nm, red curve) and  $\text{EuCl}_2$  introduced to  $\text{BmimBF}_4$  ( $\lambda_{\text{ex}} = 460$  nm, black curve), the emission spectrum (black curve) was measured after several hours trying to dissolve  $\text{EuCl}_2$  in  $\text{BmimBF}_4$ , the  $\text{EuCl}_2$  particles remain dispersed in the ionic liquid.

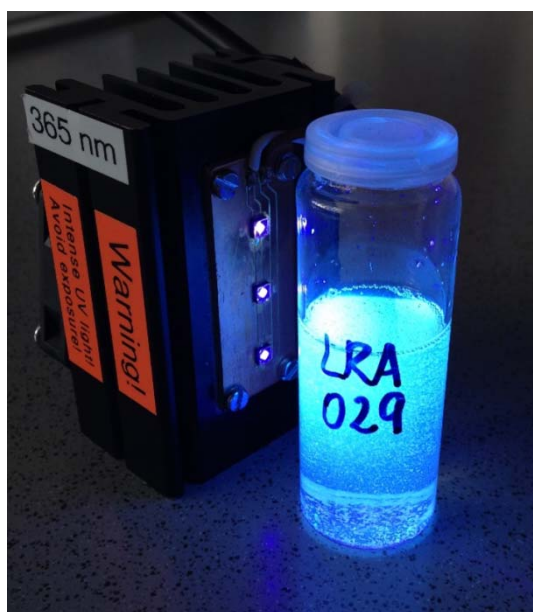

Figure S3: Blue luminescence of  $\text{EuBr}_2$  dissolved in  $\text{BmimBF}_4$  irradiated with UV light (365 nm) after cooling down from 60 °C to room temperature.

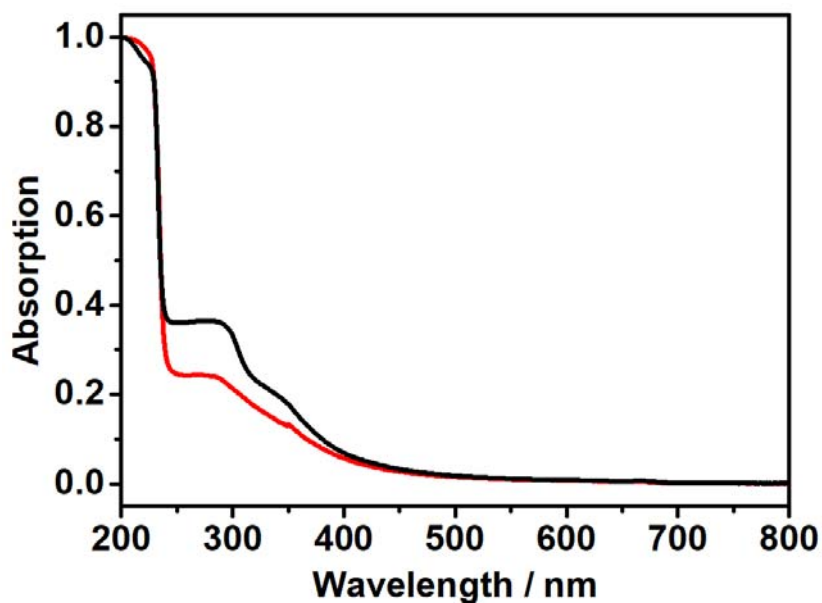

Figure S4: *Ex-situ* UV/Vis absorption spectra of  $\text{BmimBF}_4$  (black curve) and  $\text{EuBr}_2$  dissolved in  $\text{BmimBF}_4$  (red curve).
